# Supplementary material
Source: publisher figshare collection journal article supplement (https://gsapubs.figshare.com/ndownloader/files/35980808)
Supplement: Supplementary file 1 [file 35980808]

Petermann, H., Lyson, T.R., Miller, I.M., and Hagadorn, J.W., 2022, Crushed turtle shells: Proxies for lithification and burial depth histories: Geosphere, v. 18, https://doi.org/10.1130/GES02513.1.

**Table S4.** Outcomes of similarity tests between plastron- and carapace-based depth estimates. Plastron and carapace depth models are similar.

|  | **Plastron depth and Carapace depth are similar** | | |
| --- | --- | --- | --- |
| D-statistic | 0.071 | 0.029 | 0.071 |
| p-value | 0.994 | 0.944 | 0.7 |
| alternative hypothesis | two-sided | Plastron depth overestimates | Carapace depth overestimates |
| method | Two-sample Kolmogorov-Smirnov test | | |
